# Supplementary material for: Flax fibre reinforced alginate poloxamer hydrogel: assessment of mechanical and 4D printing potential
Source: Royal Society of Chemistry journal article supplement (doi:10.1039/d4sm00135d), 2024-01-01
Supplement: d4sm00135d1.pdf [file d4sm00135d1.pdf]

Cite this: DOI: 00.0000/xxxxxxxxxx

## ESI: Flax fibre reinforced alginate poloxamer hydrogel: assessment of mechanical and 4D printing potential

Charles de Kergariou<sup>\*a</sup>, Graham J. Day<sup>bc</sup>, Adam W. Perriman<sup>cd</sup>, James P.K. Armstrong<sup>e</sup> and Fabrizio Scarpa<sup>a</sup>

Received Date

Accepted Date

DOI: 00.0000/xxxxxxxxxx

This supplementary material presents the printing paths and geometries for the different tests conducted. It also provides a detailed procedure for the production of the composite hydrogels studied. Examples of stress strain curves for the tensile, rheology and annulus scaffold compression tests are also provided.

### 1 Hydrogel production

Tab. S1 The different steps of production of the hydrogel. The ingredients are added from top to bottom. Stock 1 was produced by heating the mixture in the autoclave for 12h. 24h in the fridge was necessary before the mixture to be used. The stock 2 was obtained by mixing the ingredient twice one minute at 3500rpm in a DAQ mixer with manual mixing in between. Finally the printing material was obtained by mixing the material twice for 5 minutes at 3500rpm with manual mixing in between. All these different steps were conducted at room temperature.

| Stock 1            | Stock 2              | Print Material          |
|--------------------|----------------------|-------------------------|
| Poloxamer 29.95wt% | Stock 1 66wt%        | Stock 2 66.7%wt         |
| Water 70.05wt%     | Sodium Alginate 9wt% | Flax Fibre nwt%         |
| /                  | Water 25wt%          | Water 23.3-n%wt         |
| /                  | /                    | CaCl <sub>2</sub> 10%wt |

<sup>a</sup> Bristol Composites Institute, School of Civil, Aerospace and Design Engineering (CADE), University of Bristol, University Walk, Bristol BS8 1TR, UK; E-mail: hl18503@bristol.ac.uk

<sup>b</sup> Biomedical Engineering, James Watt School of Engineering, University of Glasgow, Glasgow, UK

<sup>c</sup> School of Cellular and Molecular Medicine, University of Bristol, BS8 1TD Bristol, UK

<sup>d</sup> Research School of Chemistry and John Curtin School of Medical Research, Australian National University, Canberra ACT2601, Australia

<sup>e</sup> Department of Translational Health Sciences, Bristol Medical School, University of Bristol, BS1 3NY Bristol, UK

† Electronic Supplementary Information (ESI) available: [details of any supplementary information available should be included here]. See DOI: 10.1039/cXsm00000x/

‡ Additional footnotes to the title and authors can be included e.g. 'Present address:' or 'These authors contributed equally to this work' as above using the symbols: ‡, §, and ¶. Please place the appropriate symbol next to the author's name and include a ¶footnotetext entry in the the correct place in the list.

### 2 Printing path and geometry

#### 2.1 Tensile test

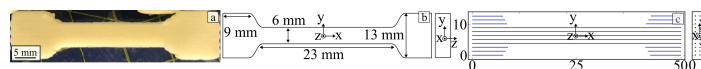

Fig. S1 Tensile test specimens. a): Printed specimens b): Printing dimensions c): Printing path in mm.

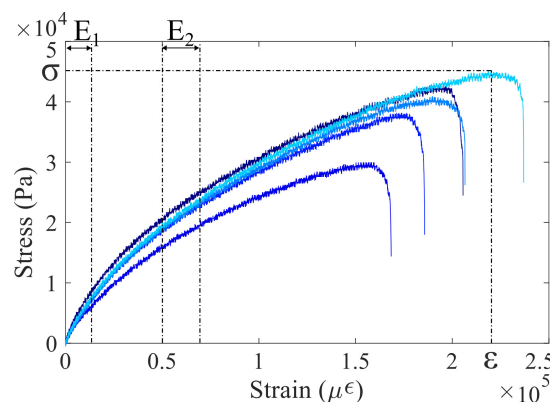

Fig. S2 Stress versus strain curve for alginate-poloxamer hydrogel with 1% flax fibre weight fraction, including definition of the related mechanical properties/engineering constants.

## 2.2 Filament Fusion test

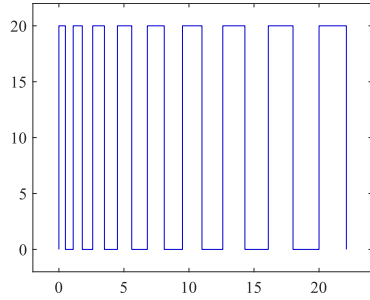

Fig. S3 Printing path for fusion filament test in mm.

## 2.3 Annulus scaffold

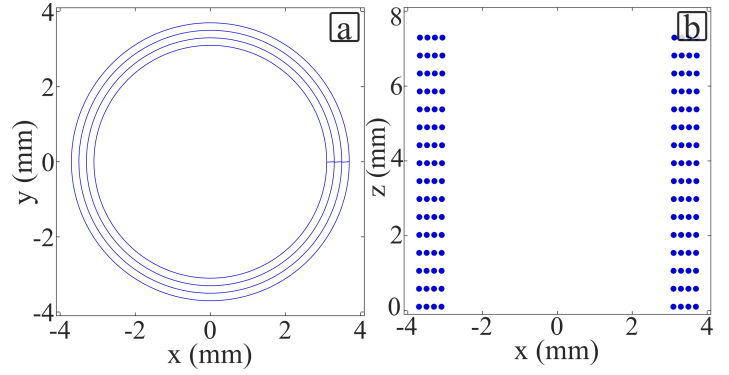

Fig. S4 Printing path to produce cylinder specimen. a): Top view; b): Side view.

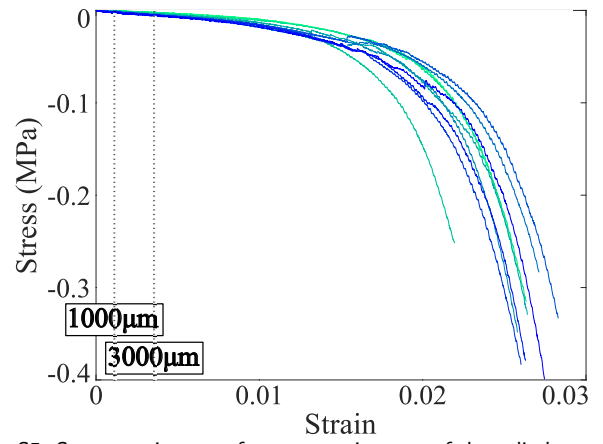

Fig. S5 Stress strain curve for compression test of the cylinder.

## 2.4 Rheology test

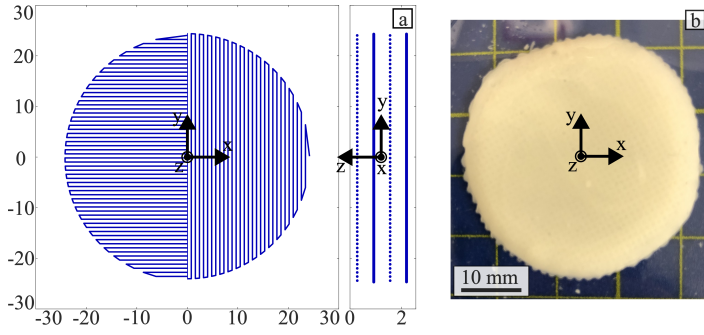

Fig. S6 Rheological specimen. a): Printing path in mm b): Printed specimens.

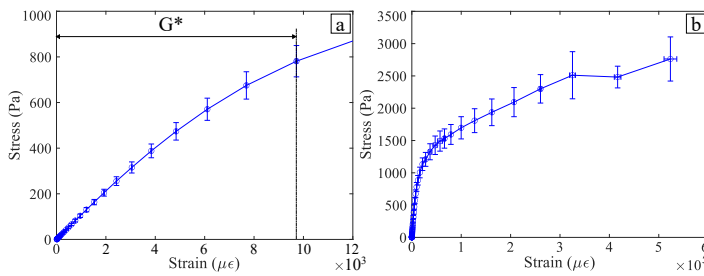

Fig. S7 Stress strain curve rheology for 1% of fibre weight fraction. a): Zoom on the stress range curve used to calculate the complex modulus. b): Full strain range.

## 2.5 Density and Coefficient of Moisture Expansion

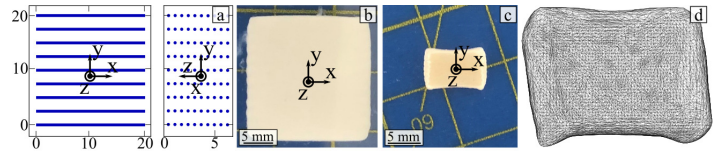

Fig. S8 Density and coefficient of moisture expansion measurement. a): Printing path in mm b): Wet specimen c): Dry specimen d): 3D scanner volume of dried specimen.

## 2.6 4D printing

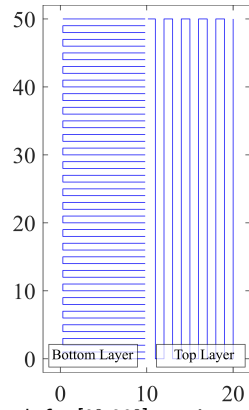

Fig. S9 4D printed path for  $[0^\circ;90^\circ]$  specimens in mm.

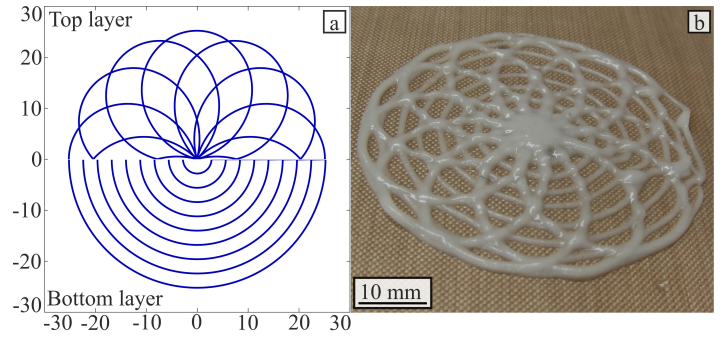

Fig. S10 4D printed rosette. a): Printing path in mm b): Printed and cross-linked rosette.
